# Supplementary material for: Glycerol Dehydration to Acrolein Catalyzed by Silicotungstic Acid: Effect of Mesoporous Support
Source: MDPI journal article supplement (doi:10.3390/eng4010012), 2023-01-07
Supplement: s1 [file s1]

## ***Supplementary Materials***

### **Glycerol dehydration to acrolein catalyzed by silicotungstic acid: effect of mesoporous support**

Lu Liu<sup>1</sup>, Fei Yu<sup>2</sup>, Siqun Wang<sup>3</sup>, Xiaofei Philip Ye<sup>1\*</sup>

<sup>1</sup> Department of Biosystems Engineering and Soil Science, The University of Tennessee, Knoxville, TN 37996, USA

<sup>2</sup> Department of Agricultural and Biological Engineering, Mississippi State University, Mississippi State, MS 39762, USA

<sup>3</sup> Center for Renewable Carbon, The University of Tennessee, Knoxville, TN 37996, USA

\* Corresponding author: Phone: +1-(865)-974-7129. E-mail: xye2@utk.edu

### **Vaporization of glycerol solution**

Glycerol decomposition starts at 290 °C [37]. Usually above 350 °C, pyrolysis is the primary reaction occurring in the system. The boiling point of pure glycerol is 290 °C, while its dilution in water lowers its partial vapor pressure. Therefore, it is necessary to determine what is the low-end temperature limit to conduct the glycerol dehydration and ensure a gas-phase reaction.

The Antoine equation describes the relationship between vapor pressure and temperature for a pure substance, as shown in Equation S-1. The constants and applicable temperature range of the equation for water and glycerol are listed in Table S-1.

$$\log_{10} P = A - \frac{B}{C + T}$$

**Equation S-1**

where  $P$  is the vapor pressure (mm Hg),  $T$  is the temperature ( $^{\circ}\text{C}$ ), and  $A$ ,  $B$ , and  $C$  are the constant parameters fitted to each substance.

**Table S1. Antoine coefficients and the temperature range for glycerol and water [38,39].**

|          | $A$     | $B$     | $C$     | $T_{\min} (^{\circ}\text{C})$ | $T_{\max} (^{\circ}\text{C})$ |
|----------|---------|---------|---------|-------------------------------|-------------------------------|
| Water    | 8.14019 | 1810.94 | 244.485 | 99                            | 374                           |
| Glycerol | 7.01621 | 1448.81 | 62.4928 | 96                            | 576.85                        |

Based on Antoine equation, the vapor pressure of pure substance glycerol or water can be calculated for any temperature in the range. Figure S-1 shows the plot of vapor pressure of glycerol and water as a function of temperature.

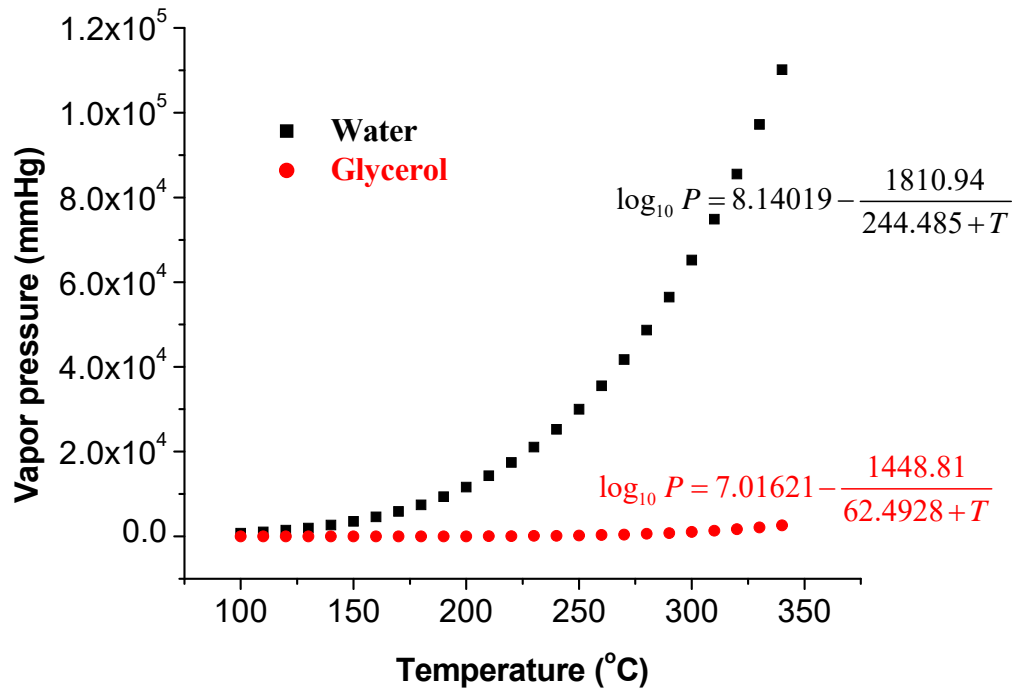

**Figure S1. Vapor pressure as a function of temperature for water and glycerol calculated via Antoine Equation.**

Considering the 20 wt.% glycerol in water (equivalent to a molar percentage of 4.6632%) as an ideal solution, then according to Raoult's law, there are following relationships for the two-component system (Equations S-2 and S-3):

$$P_t = P_{water}^* \cdot x_{water} + P_{glycerol}^* \cdot x_{glycerol} \quad \text{Equation S-2}$$

$$P_{water} = P_{water}^* \cdot x_{water} \quad \text{and} \quad P_{glycerol} = P_{glycerol}^* \cdot x_{glycerol} \quad \text{Equation S-2}$$

where  $p_t$  is the total vapor pressure in the two-component system,  $p^*$  is the vapor pressure of the pure component (water or glycerol, as specified by the subscript), and  $p$  is the partial vapor pressure of each component (specified by the subscript).  $x$  is the molar percentage of each component ( $x_{water}$  = 95.3368% and  $x_{glycerol}$  = 4.6632%) in the liquid phase, which is the composition of our feed solution.

The two-component solution should be completely evaporated at a total vapor pressure of 760 mm Hg, which is our reaction pressure. The following steps detail our approach to prove that the reactions were conducted at gas phase. 1) Assume a temperature in the range (100–290 °C), so that partial vapor pressure can be calculated for both glycerol and water using the Antoine equation and Raoult's law; therefore, the total vapor pressure can be expressed as a function of only one variable,  $x_{glycerol}$ . 2) Let the total vapor pressure be equal to 760 mm Hg, then solve the equation for  $x_{glycerol}$ . 3) The gas-phase molar composition is then calculated via Equation S-4 by combining Dalton's law (Equation S-5) and Raoult's law (Equations S-2 and S-3). 4) Temperature is varied to cover more data points within the range of 100–290 °C.

$$y_{glycerol} = \frac{p_{glycerol}^* \cdot x_{glycerol}}{p_{water}^* \cdot x_{water} + p_{glycerol}^* \cdot (1 - x_{water})} \quad \text{Equation S-3}$$

$$p_{water} = p_t \cdot y_{water} \quad \text{and} \quad p_{glycerol} = p_t \cdot y_{glycerol} \quad \text{Equation S-4}$$

The  $T$ - $x$ - $y$  diagram of the glycerol-water system can be therefore plotted (Figure S-2), which displays the boiling point for the solution of a certain glycerol molar concentration, and the corresponding glycerol molar percentage in the vapor phase can be found. Based on this diagram, the temperature obtained from the  $T$ - $x$ - $y$  graph for a vapor with 4.6632% glycerol molar concentration is 210 °C. Therefore, if the reaction temperature is maintained above 210 °C, the 20 wt.% glycerol solution is completely vaporized.

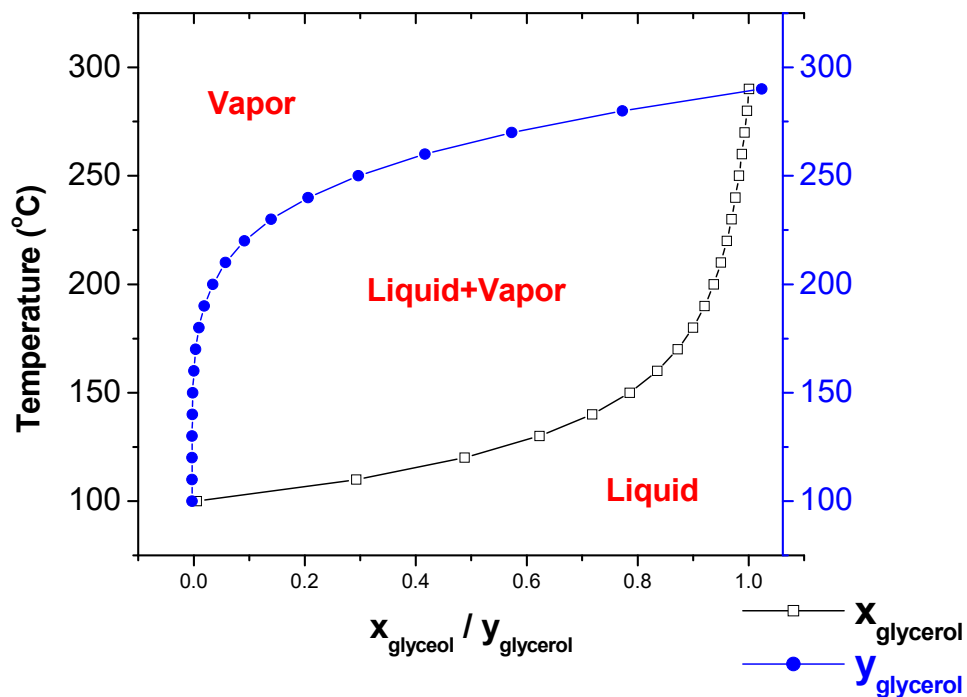

Figure S2. *T-x-y* diagram for the glycerol-water two-component system at 760 mm Hg

## References

37. NIH. National Library of Medicine, Material Data Sheet. Available from: <https://pubchem.ncbi.nlm.nih.gov/compound/Glycerol>.
38. Yaws, C.L., P. Narasimhan, and C. Gabbula, Yaws' Handbook of Antoine Coefficients for Vapor Pressure (2nd Electronic Edition). 2009.
39. The Dortmund Data Bank. Available from: [http://www.ddbst.com/en/online/Online\\_Calc\\_vap\\_Form.php?component=Water](http://www.ddbst.com/en/online/Online_Calc_vap_Form.php?component=Water).
