# Supplementary material for: Glycerol Dehydration to Acrolein Catalyzed by Silicotungstic Acid: Effect of Mesoporous Support
Source: MDPI journal article supplement (doi:10.3390/eng4010012), 2023-01-07
Supplement: s1 [file s1]

Archive with 1 entries (1 files):
- eng-2030099-supplementary.pdf
